# Supplementary material
Source: PubMed Central journal article supplement (PMC152981)

a.i.

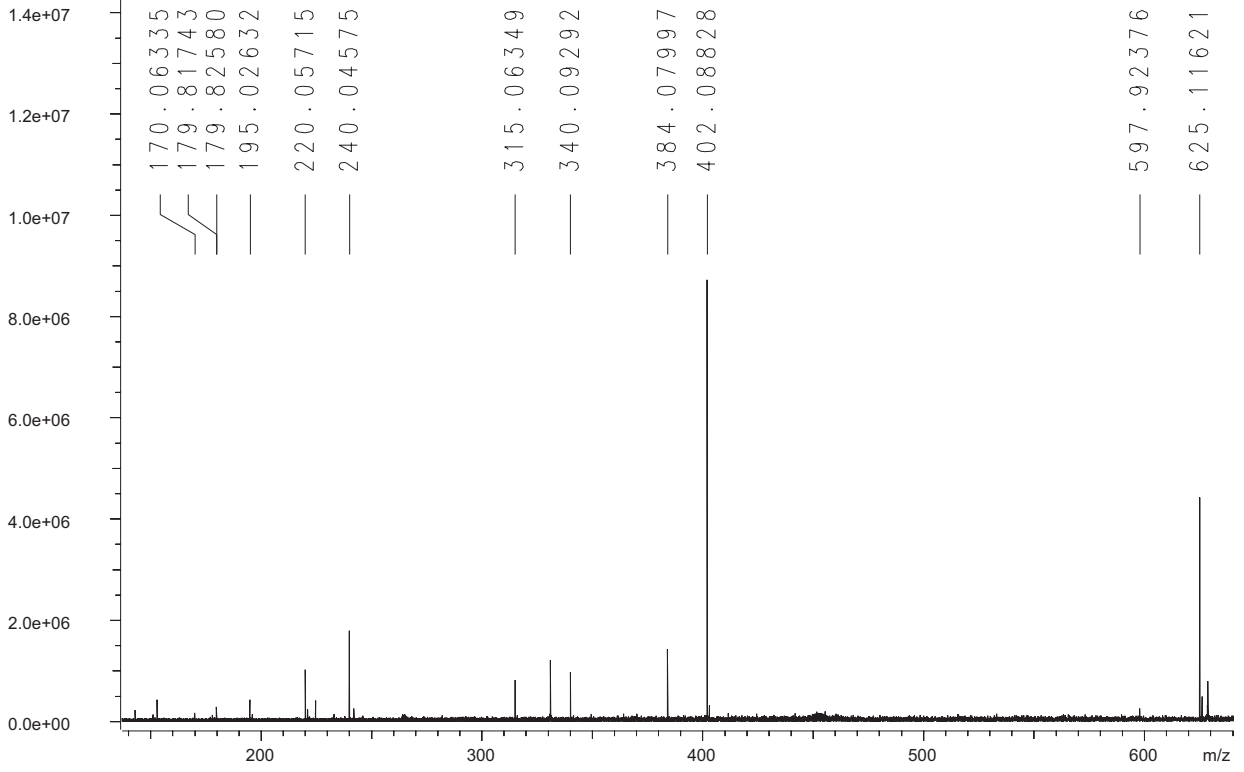

Supplement: pnas_0737682100_2.pdf [file pnas_0737682100_2.pdf]
